# Supplementary material for: Monitoring the stability of aerobic granular sludge using fractal dimension analysis
Source: Royal Society of Chemistry journal article supplement (doi:10.1039/d1ew00015b), 2021-01-01
Supplement: d1ew00015b1.pdf [file d1ew00015b1.pdf]

## Electronic Supplementary Information

### Monitoring the stability of aerobic granular sludge using fractal dimension analysis

Juan Pablo Pavissich<sup>a,b</sup>, Nicolás Camus<sup>a</sup>, José Luis Campos<sup>a\*</sup>, Óscar Franchi<sup>a</sup>, Alba Pedrouso<sup>c</sup>,  
Paula Carrera<sup>c</sup>, Ángeles Val del Río<sup>c</sup>, Anuska Mosquera-Corral<sup>c</sup>

<sup>a</sup> Facultad de Ingeniería y Ciencias, Universidad Adolfo Ibáñez, Avda. Padre Hurtado 750, Viña del Mar, Chile

<sup>b</sup> Center of Applied Ecology and Sustainability (CAPES), Santiago, Chile

<sup>c</sup> CRETUS Institute, Department of Chemical Engineering, Universidade de Santiago de Compostela, E-15705 Santiago de Compostela, Spain

\*Corresponding author. E-mail: [jluis.campos@uai.cl](mailto:jluis.campos@uai.cl); Tel: +56 (32) 250 3716

Table S1. Statistical analysis of SVI values observed during the different granules' formation stages.

|                | Formation | Maturation | Steady state | Disintegration |
|----------------|-----------|------------|--------------|----------------|
| Formation      | 1         | 0.0138     | 0.0221       | 0.0474         |
| Maturation     | 0.0138    | 1          | 0.3970       | 0.7139         |
| Steady state   | 0.0221    | 0.3970     | 1            | 0.6647         |
| Disintegration | 0.0474    | 0.7139     | 0.6647       | 1              |

Bonferroni corrected significance level: 0.0083

Table S2. Statistical analysis of density values observed during the different granules' formation stages.

|                | Formation | Maturation | Steady state | Disintegration |
|----------------|-----------|------------|--------------|----------------|
| Formation      | 1         | 0.0032     | 0.0067       | 0.2791         |
| Maturation     | 0.0032    | 1          | 0.6679       | 0.5275         |
| Steady state   | 0.0067    | 0.6679     | 1            | 0.3854         |
| Disintegration | 0.2791    | 0.5275     | 0.3854       | 1              |

Bonferroni corrected significance level: 0.0083

Table S3. Statistical analysis of diameter mean values observed during the different granules' formation stages.

|                | Formation | Maturation | Steady state | Disintegration |
|----------------|-----------|------------|--------------|----------------|
| Formation      | 1         | 0.5979     | 0.0331       | 0.6719         |
| Maturation     | 0.5979    | 1          | 0.0724       | 0.9600         |
| Steady state   | 0.0331    | 0.0724     | 1            | 0.1717         |
| Disintegration | 0.6719    | 0.9600     | 0.1717       | 1              |

Bonferroni corrected significance level: 0.0083

Table S4. Statistical analysis of diameter relative standard deviation values observed during the different granules' formation stages.

| Comparison                     | Difference | Standardized difference | Critical value | Pr > Diff | Significant |
|--------------------------------|------------|-------------------------|----------------|-----------|-------------|
| Formation vs Disintegration    | 15.0529    | 3.6390                  | 2.7304         | 0.0057    | Yes         |
| Formation vs Steady state      | 13.6729    | 3.5702                  | 2.7304         | 0.0068    | Yes         |
| Formation vs Maturation        | 10.0847    | 3.4290                  | 2.7304         | 0.0097    | Yes         |
| Maturation vs Disintegration   | 4.9681     | 1.2427                  | 2.7304         | 0.6058    | No          |
| Maturation vs Steady state     | 3.5881     | 0.9752                  | 2.7304         | 0.7645    | No          |
| Steady state vs Disintegration | 1.3800     | 0.2942                  | 2.7304         | 0.9909    | No          |

Tukey's d critical value: 3.8613

Table S5. Statistical analysis of fractal dimension mean values observed during the different granules' formation stages.

|                | Formation | Maturation | Steady state | Disintegration |
|----------------|-----------|------------|--------------|----------------|
| Formation      | 1         | < 0.0001   | 0.0046       | 0.5108         |
| Maturation     | < 0.0001  | 1          | 0.9475       | 0.0447         |
| Steady state   | 0.0046    | 0.9475     | 1            | 0.0998         |
| Disintegration | 0.5108    | 0.0447     | 0.0998       | 1              |

Bonferroni corrected significance level: 0.0083

Table S6. Statistical analysis of fractal dimension relative standard deviation values observed during the different granules' formation stages.

|                | Formation | Maturation | Steady state | Disintegration |
|----------------|-----------|------------|--------------|----------------|
| Formation      | 1         | < 0.0001   | < 0.0001     | 0.9166         |
| Maturation     | < 0.0001  | 1          | 0.3863       | 0.0039         |
| Steady state   | < 0.0001  | 0.3863     | 1            | 0.0019         |
| Disintegration | 0.9166    | 0.0039     | 0.0019       | 1              |

Bonferroni corrected significance level: 0.0083

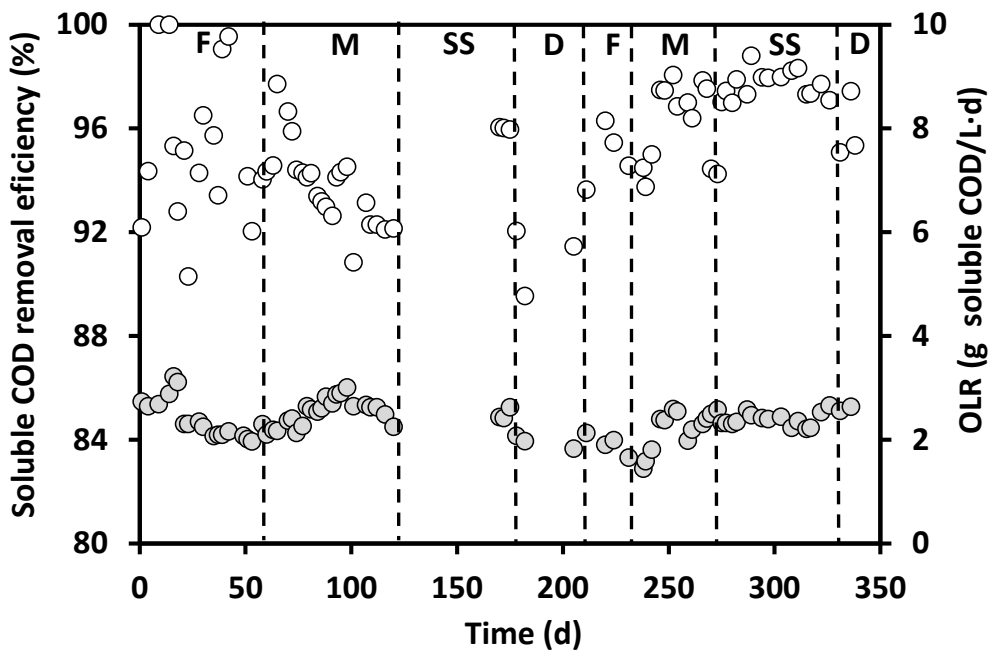

Fig. S1. Soluble COD removal efficiency (○) and organic loading rate (OLR) (●) of SBR1.

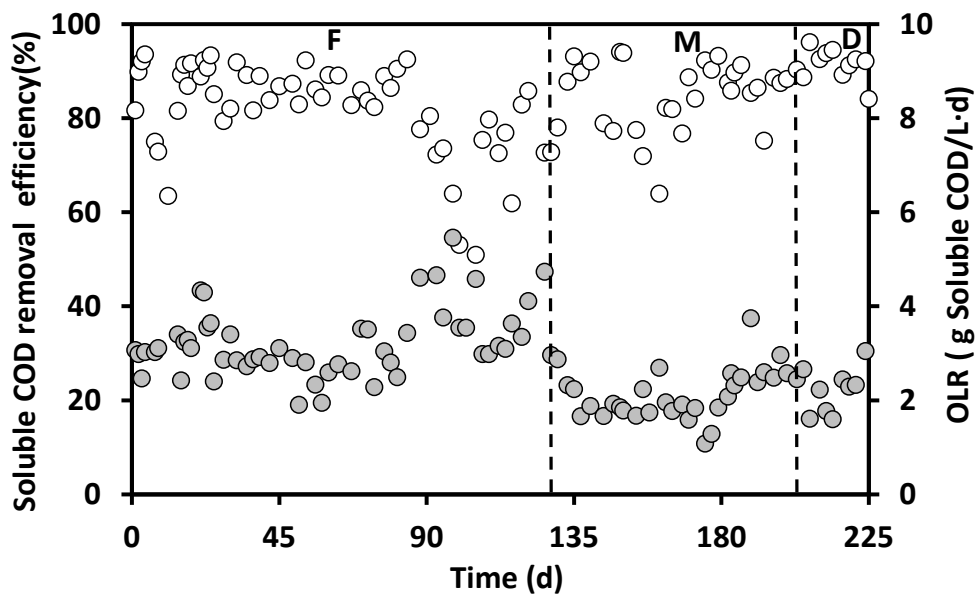

Fig. S2. Soluble COD removal efficiency (○) and OLR (●) of SBR2.

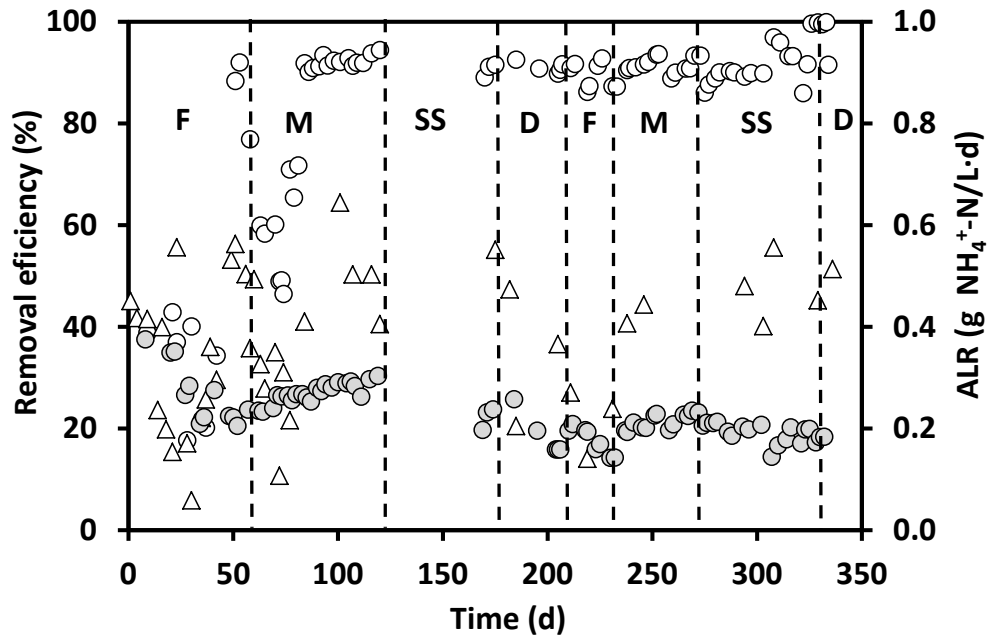

Fig. S3. Ammonia (○) and nitrogen (Δ) removal efficiency (○) and ammonia loading rate (ALR) (●) of SBR1.

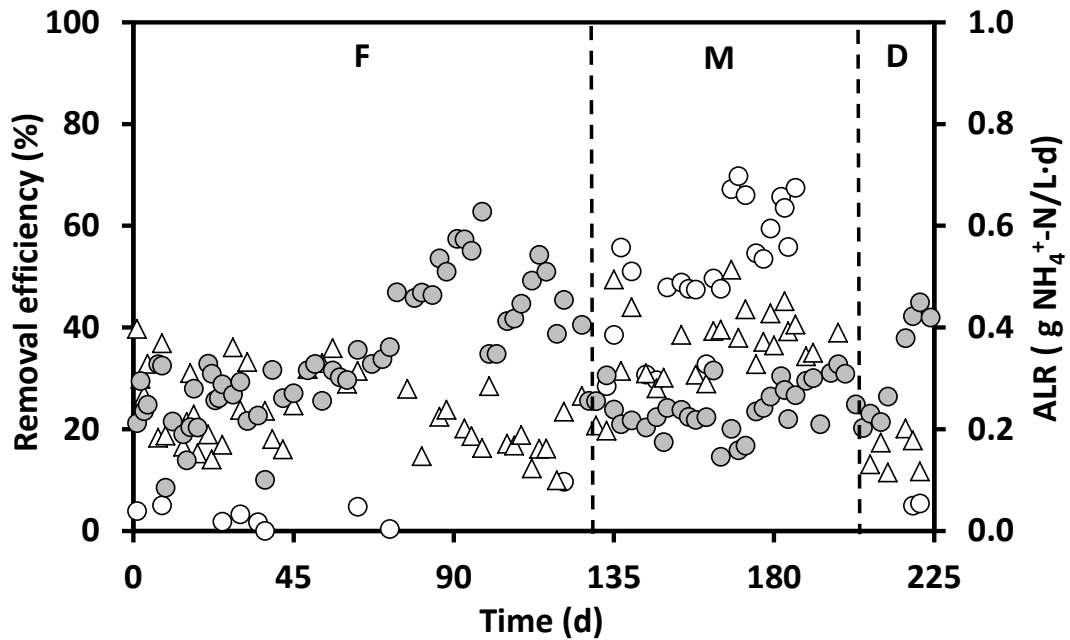

Fig. S4. Ammonia (○) and nitrogen (Δ) removal efficiency (○) and ALR (●) of SBR2.
